# Supplementary material
Source: PubMed Central journal article supplement (PMC6510478)
Supplement: NIHMS1017972-supplement-Supplemental_information.pdf [file NIHMS1017972-supplement-Supplemental_information.pdf]

# Appendix figure A1

## A [U-<sup>13</sup>C]-Glucose metabolomics

Achilles tendon surgery (n=16)

Sham (Skin incision) surgery (n=4)

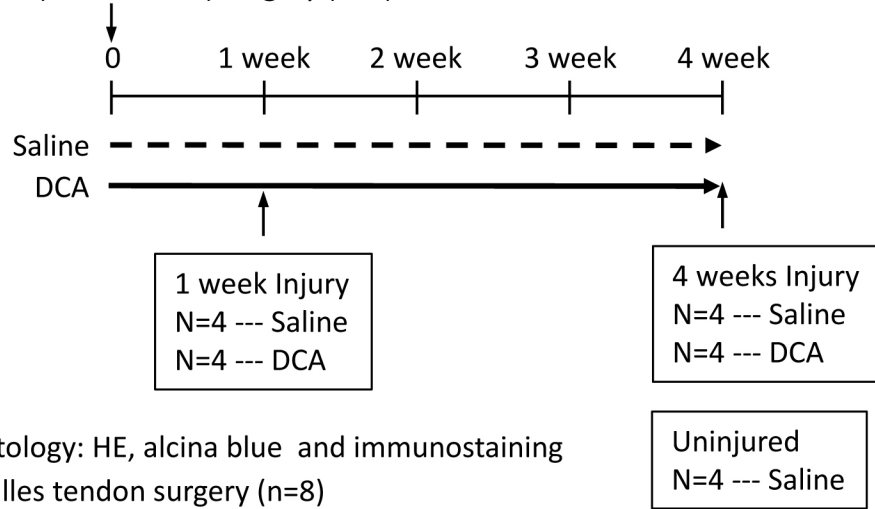

## B Histology: HE, alcina blue and immunostaining

Achilles tendon surgery (n=8)

Sham (Skin incision) surgery (n=4)

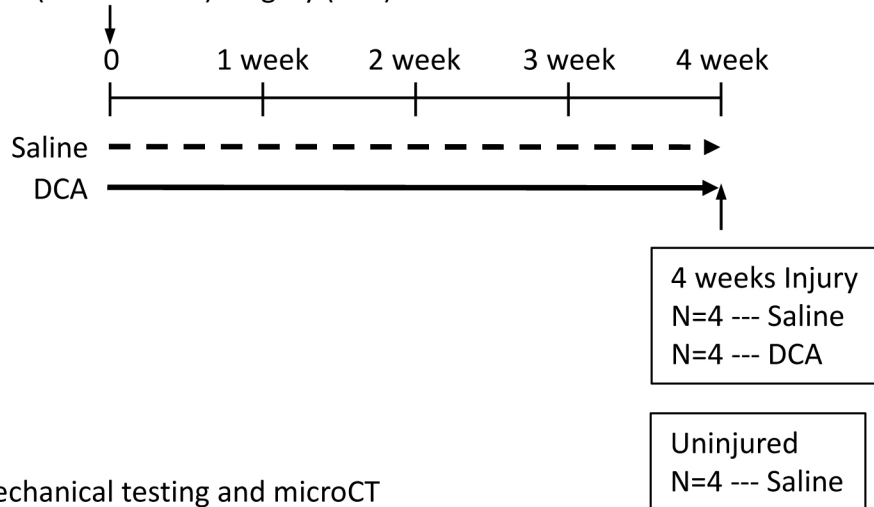

## C Mechanical testing and microCT

Achilles tendon surgery (n=30)

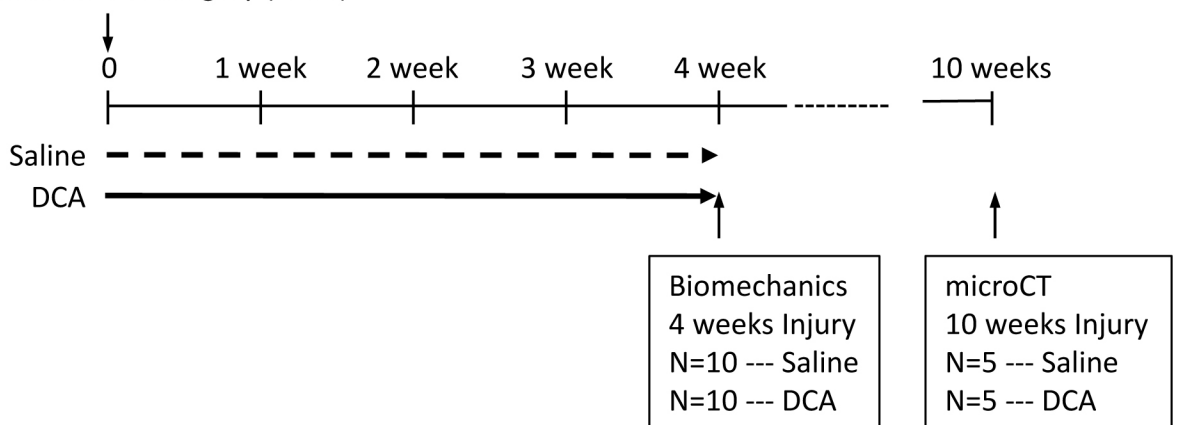

# Appendix figure A2

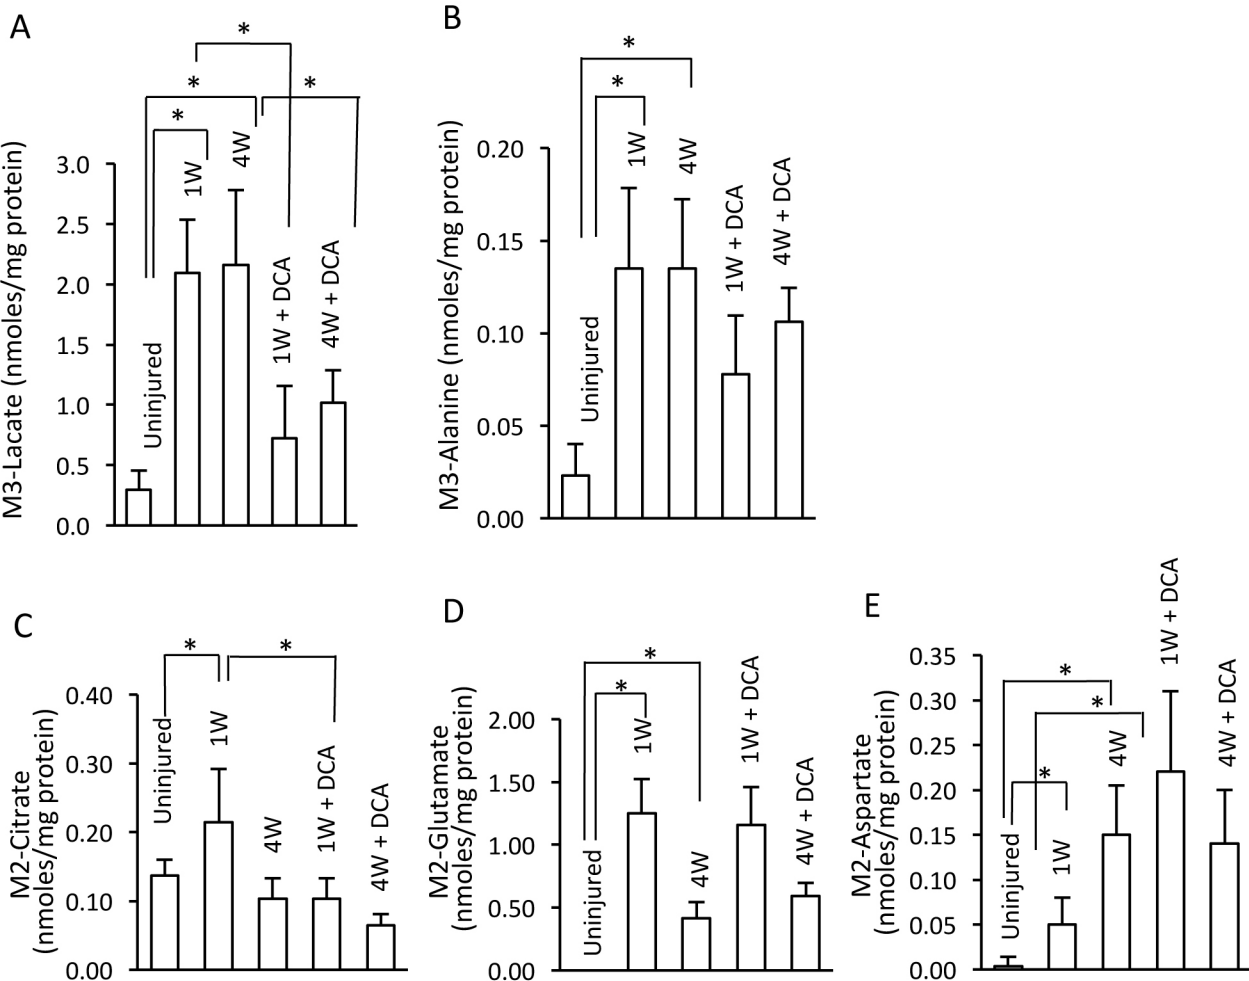

Appendix figure A2. The generation of  $^{13}\text{C}$  mass isotopomers of metabolites. The concentrations of  $^{13}\text{C}$ -labeled metabolites, (A) lactate, (B) alanine, (C) citrate, (D) aspartate (D) or (E) glutamate was calculated by  $^{13}\text{C}$  enrichment ( $M\%E/100$ ) of mass isotopomers times concentration (nmol per mg protein) from the same tendon extracts described in the legend to Figure 1. The values represent mean  $\pm$  1 S.D. \*,  $p < 0.05$

# Appendix Figure A3

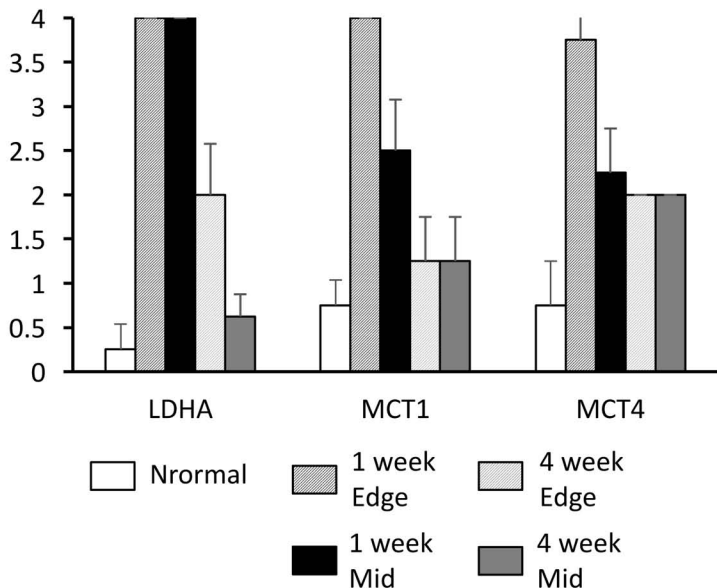

Appendix Figure A3. Semi-quantitative analysis of immunostaining for LDHA, MCT1 and MCT4 in injured tendons. The immunostaining images in Figure 3 were scored from 0-4 as 4 was strongest staining. The graphs represent mean  $\pm$  1S.D.

# Appendix figure A4

## A Body weight

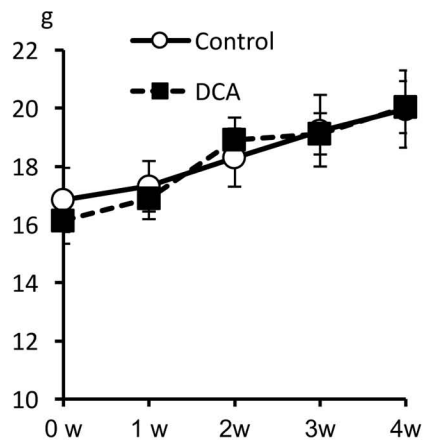

## B Body length

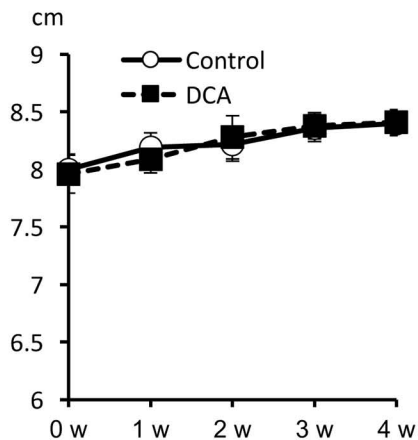

Appendix Figure A4. Body weights and lengths of the mice that received Achilles tendon injury surgery and DCA treatment. C57BL/6j female mice received the Achilles injury surgery. DCA treatment (100 mg/kg, daily intraperitoneal injections) or vehicle saline treatment (Control) was performed from 1 day after surgery to 4 weeks. Body weight (A) and length (B) were measured weekly. The graphs represent average $\pm$ S.D.
